# Supplementary material for: The novel long noncoding RNA CRART16 confers cetuximab resistance in colorectal cancer cells by enhancing ERBB3 expression via miR-371a-5p
Source: Springer Nature journal article supplement (doi:10.1186/s12935-020-1155-9), 2020-03-04

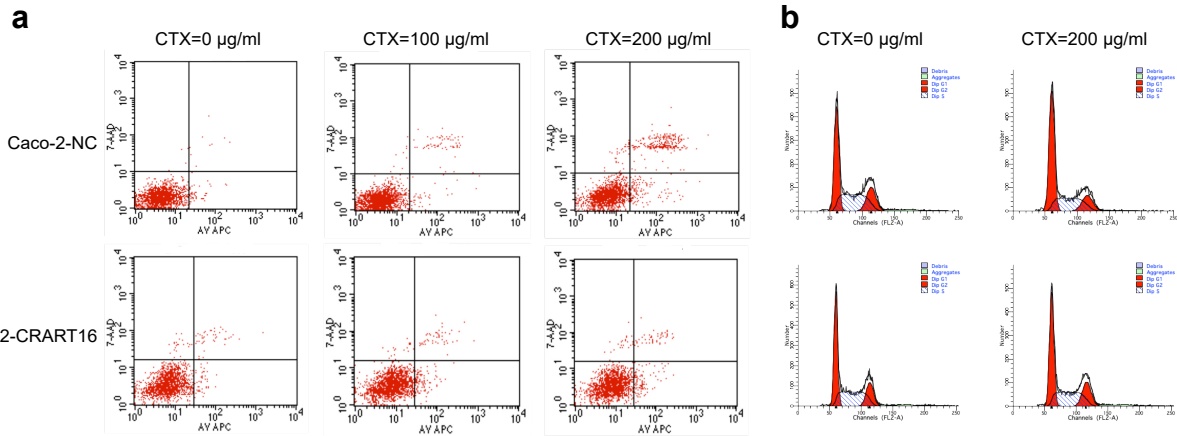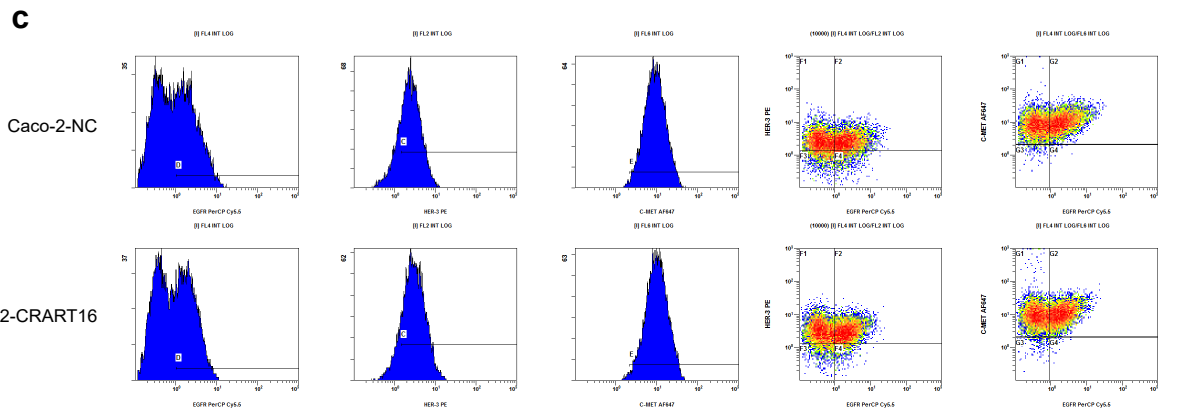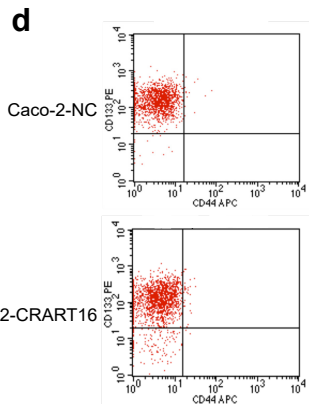

Supplement: MOESM2 [file 17770628]
